# Supplementary material for: Does the Food Ingredient Pectin Provide a Risk for Patients Allergic to Non-Specific Lipid-Transfer Proteins?
Source: MDPI journal article supplement (doi:10.3390/foods11010013), 2021-12-21
Supplement: s1 [file s1]

# Supplemental Material

## Does the Food Ingredient Pectin Provide a Risk for Patients Allergic to Non-Specific Lipid-Transfer Proteins?

*Hanna Steigerwald<sup>1</sup>, Frank Blanco-Perez<sup>1</sup>, Melanie Albrecht<sup>1</sup>, Caroline Bender<sup>2</sup>, Andrea Wangorsch<sup>1</sup>, Hans-Ulrich Endreß<sup>3</sup>, Mirko Bunzel<sup>2</sup>, Cristobalina Mayorga<sup>4</sup>, Maria José Torres<sup>4</sup>, Stephan Scheurer<sup>1,\*</sup>, Stefan Vieths<sup>1</sup>*

<sup>1</sup>Paul-Ehrlich-Institut (PEI), Federal Institute for Vaccines and Biomedicines, Langen, Germany

<sup>2</sup>Karlsruhe Institute of Technology (KIT), Institute of Applied Biosciences, Karlsruhe, Germany

<sup>3</sup>Herbstreith & Fox KG, Neuenbürg, Germany

<sup>4</sup>Allergy Unit, IBIMA-Regional University Hospital of Malaga-UMA, Malaga, Spain

**a**

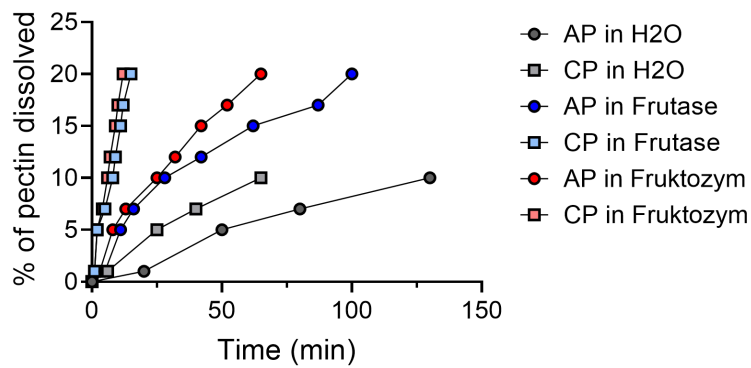

**b**

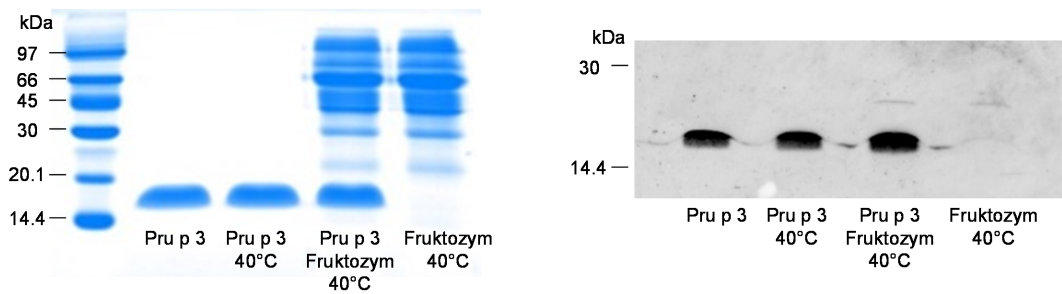

**Figure S1:** Comparison of solubility of AP and CP in H<sub>2</sub>O, Fructose®-solution or Fructose®-solution (a). Impact of Fructose® or treatment at 40°C for 4 h on detectability and reactivity of nPru p 3 was examined. nPru p 3 (100 µg/ml), heat-treated nPru p 3, Fructose®-treated nPru p 3 as well as Fructose® alone were analyzed by SDS-PAGE (left) and immunoblotting (right) using cross-reactive nsLTP rabbit antiserum (b).

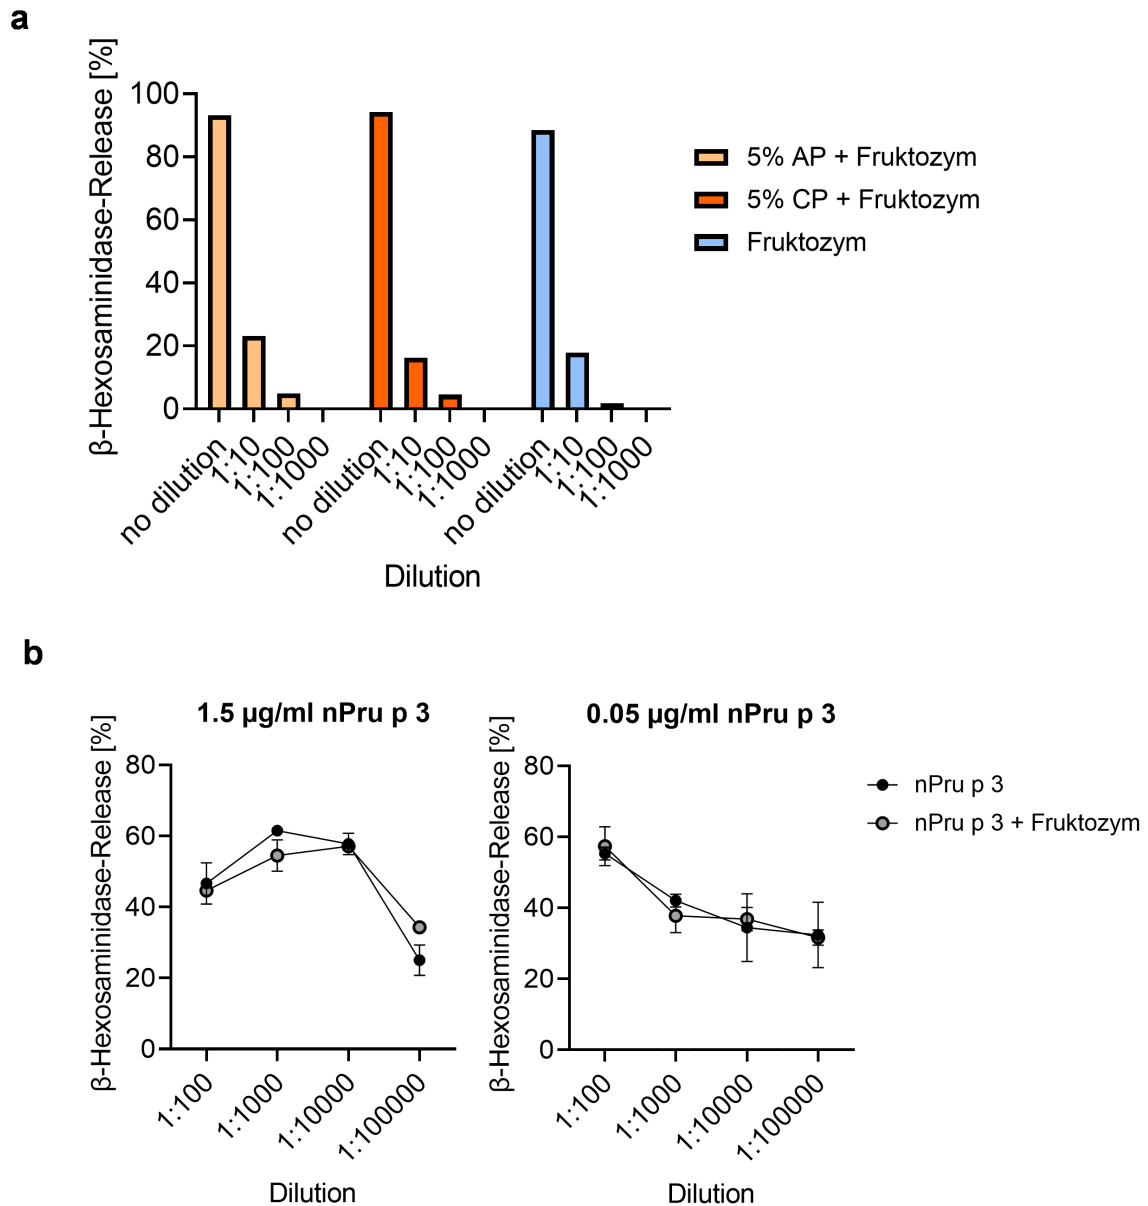

**Figure S2:** Spontaneous  $\beta$ -Hexosaminidase release from huRBL cells was examined by incubation with Fruktozym<sup>®</sup>, 5% AP + Fruktozym<sup>®</sup> or 5% CP + Fruktozym<sup>®</sup> (1:30 in H<sub>2</sub>O [v/v]) dilution series (a). Comparison of nPru p 3-dependent IgE-mediated  $\beta$ -Hexosaminidase release with and without prior Fruktozym<sup>®</sup>-treatment. Pru p 3 was diluted in Fruktozym<sup>®</sup> (1:30 in H<sub>2</sub>O [v/v]) (b).
